# Supplementary material for: Core Circadian Clock Proteins as Biomarkers of Progression in Colorectal Cancer
Source: MDPI journal article supplement (doi:10.3390/biomedicines9080967), 2021-08-06
Supplement: s1 [file s1]

## Supplementary Material

**Table S1.** IHC staining conditions for each core circadian protein analysed.

| Protein | Conditions                                 |                  |
|---------|--------------------------------------------|------------------|
|         | Antigen Retrieval                          | Primary Antibody |
| CRY-1   | CC1 <sup>a</sup> (pH 8.4, 24 min)          | 30 min, 37 °C    |
| CRY-2   | CC1 <sup>a</sup> (pH 8.4, 1 h)             | 32 min, 37 °C    |
| PER-1   | CC1 <sup>a</sup> (pH 8.4, 48 min)          | 1 h, 37 °C       |
| PER-2   | Ribo CC o CC2 <sup>b</sup> (pH 6, 24 min)  | 1 h, 37 °C       |
| PER-3   | Ribo CC o CC2 <sup>b</sup> (pH 6, 24 min)  | 1/50, 1 h, 37 °C |
| Bmal1   | CC1 <sup>a</sup> (pH 8.4, 24 min), (1/50,) | 30 min, 37 °C    |
| NR1D2   | CC1 <sup>a</sup> (pH 8.4, 24 min)          | 1 h, 37 °C       |

<sup>a</sup> CC1: ethylenediaminetetraacetic acid (EDTA)-based heat-induced antigen retrieval; <sup>b</sup> Ribo CC o CC2, citrate-based heat-induced enzyme retrieval.

**Table S2.** Relationship between expression levels of circadian proteins and development of MM after disease diagnosis of individuals included in the study.

|                                 |     | PER1         |            |                       | PER2         |            |                       | PER3          |            |                       | CRY2       |            |                       | BMAL1        |            |                       | NR1D2        |           |                       |
|---------------------------------|-----|--------------|------------|-----------------------|--------------|------------|-----------------------|---------------|------------|-----------------------|------------|------------|-----------------------|--------------|------------|-----------------------|--------------|-----------|-----------------------|
|                                 |     | Low          | High       | <i>p</i> <sup>a</sup> | Low          | High       | <i>p</i> <sup>a</sup> | Low           | High       | <i>p</i> <sup>a</sup> | Low        | High       | <i>p</i> <sup>a</sup> | Low          | High       | <i>p</i> <sup>a</sup> | Low          | High      | <i>p</i> <sup>a</sup> |
| All patients                    | No  | 59<br>(37.8) | 97 (62.2)  | ns                    | 52<br>(33.3) | 104 (66.7) | ns                    | 142<br>(90.4) | 15 (9.6)   | ns                    | 12 (7.6)   | 145 (92.4) | ns                    | 21<br>(13.5) | 134 (86.5) | ns                    | 92<br>(59.0) | 64 (41.0) | ns                    |
|                                 | Yes | 17<br>(43.6) | 22 (56.4)  |                       | 16<br>(40.0) | 24 (60.0)  |                       | 38 (90.5)     | 4<br>(9.5) |                       | 2 (4.8)    | 39 (95.2)  |                       | 6<br>(15.0)  | 34 (85.0)  |                       | 21<br>(52.5) | 19 (47.5) |                       |
| 3 years after disease diagnosis | No  | 60<br>(37.0) | 102 (63.0) | ns                    | 54<br>(33.1) | 109 (66.9) | ns                    | 147<br>(89.6) | 17 (10.4)  | ns                    | 12 (7.3)   | 152 (92.7) | ns                    | 20<br>(12.3) | 142 (87.7) | ns                    | 95<br>(58.3) | 68 (41.7) | ns                    |
|                                 | Yes | 14<br>(48.3) | 15 (51.7)  |                       | 12<br>(41.4) | 17 (58.6)  |                       | 29 (93.5)     | 2 (6.5)    |                       | 0 (0.0)    | 30 (100.0) |                       | 6<br>(20.7)  | 23 (79.3)  |                       | 16<br>(55.2) | 13 (44.8) |                       |
| 5 years after disease diagnosis | No  | 56<br>(37.6) | 93 (62.4)  | ns                    | 50<br>(33.6) | 99 (66.4)  | ns                    | 133<br>(88.7) | 17 (11.3)  | ns                    | 11 (7.3)   | 139 (92.7) | ns                    | 19<br>(12.7) | 130 (87.2) | ns                    | 88<br>(59.1) | 61 (40.9) | ns                    |
|                                 | Yes | 15<br>(42.9) | 20 (57.1)  |                       | 15<br>(41.7) | 21 (58.3)  |                       | 36 (94.7)     | 2<br>(5.3) |                       | 1<br>(2.7) | 36 (97.3)  |                       | 6 (16.7)     | 30 (83.3)  |                       | 20<br>(55.6) | 16 (44.4) |                       |

<sup>a</sup>  $\chi^2$  or Fisher's exact tests.

**Table S3.** Relationship between expression levels of circadian proteins and development of LR after disease diagnosis of patients included in the study.

|                                 |     | PER1         |            |                       | PER2         |            |                       | PER3          |           |                       | CRY1         |            |                       | CRY2     |            |                       | BMAL1        |            |                       |
|---------------------------------|-----|--------------|------------|-----------------------|--------------|------------|-----------------------|---------------|-----------|-----------------------|--------------|------------|-----------------------|----------|------------|-----------------------|--------------|------------|-----------------------|
|                                 |     | Low          | High       | <i>p</i> <sup>a</sup> | Low          | High       | <i>p</i> <sup>a</sup> | Low           | High      | <i>p</i> <sup>a</sup> | Low          | High       | <i>p</i> <sup>a</sup> | Low      | High       | <i>p</i> <sup>a</sup> | Low          | High       | <i>p</i> <sup>a</sup> |
| All patients                    | No  | 73<br>(38.8) | 115 (61.2) | ns                    | 69<br>(36.5) | 120 (63.5) | ns                    | 171<br>(90.0) | 19 (10.0) | ns                    | 58<br>(30.7) | 131 (69.3) | ns                    | 14 (7.4) | 176 (92.6) | ns                    | 30<br>(16.0) | 158 (84.0) | ns                    |
|                                 | Yes | 12<br>(42.9) | 16 (57.1)  |                       | 12<br>(42.9) | 16 (57.1)  |                       | 29 (100.0)    | 0 (0.0)   |                       | 6 (20.7)     | 23 (79.3)  |                       | 1 (3.4)  | 28 (96.6)  |                       | 3 (10.7)     | 25 (89.3)  |                       |
| 3 years after disease diagnosis | No  | 75<br>(39.5) | 115 (60.5) | ns                    | 69<br>(35.9) | 123 (64.1) | ns                    | 173<br>(89.6) | 20 (10.4) | ns                    | 59<br>(30.7) | 133 (69.3) | ns                    | 15 (7.8) | 178 (92.2) | ns                    | 27<br>(14.1) | 164 (85.9) | ns                    |
|                                 | Yes | 9 (40.9)     | 13 (59.1)  |                       | 10 (47.6)    | 11 (52.4)  |                       | 22 (100.0)    | 0 (0.0)   |                       | 4 (18.2)     | 18 (81.8)  |                       | 0 (0.0)  | 22 (100.0) |                       | 3 (14.3)     | 18 (85.7)  |                       |
| 5 years after disease diagnosis | No  | 69<br>(39.7) | 105 (60.3) | ns                    | 64<br>(36.3) | 111 (63.7) | ns                    | 155<br>(88.6) | 20 (11.4) | ns                    | 55<br>(31.4) | 120 (68.6) | ns                    | 14 (8.0) | 162 (92.0) | ns                    | 26<br>(14.9) | 148 (85.1) | ns                    |
|                                 | Yes | 11<br>(40.7) | 16 (59.3)  |                       | 13 (48.1)    | 14 (51.9)  |                       | 28 (100.0)    | 0 (0.0)   |                       | 7 (25.0)     | 21 (75.0)  |                       | 1 (3.6)  | 27 (96.4)  |                       | 3 (11.1)     | 24 (88.9)  |                       |

<sup>a</sup>  $\chi^2$  or Fisher's exact tests.
